# Supplementary material
Source: PubMed Central journal article supplement (PMC1347996)

A

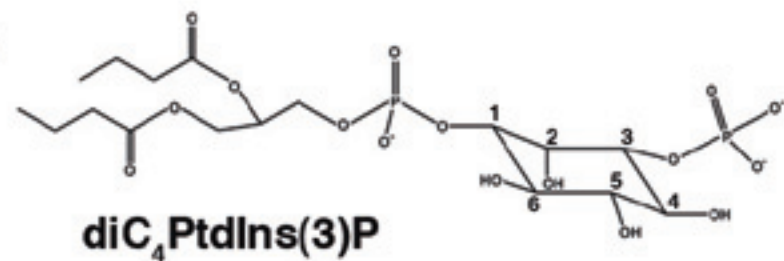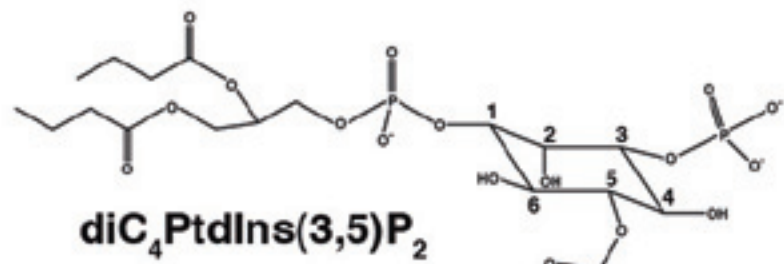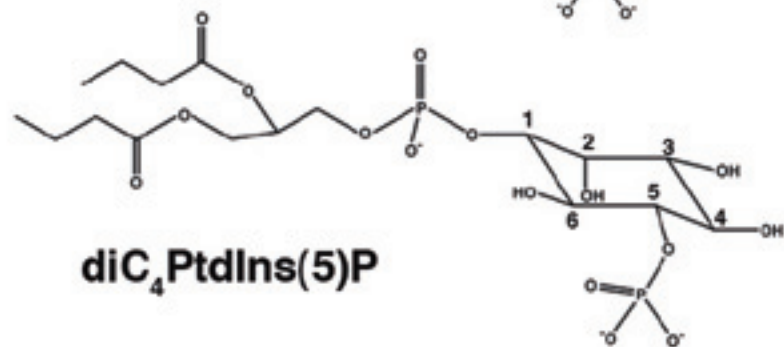

B

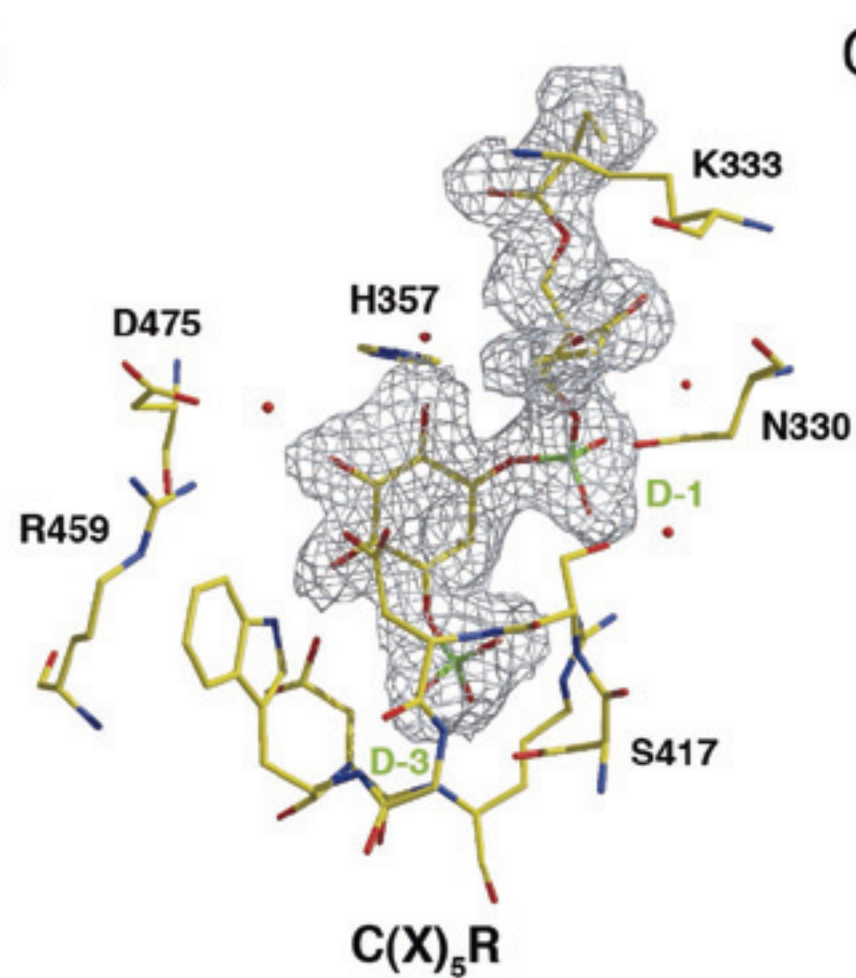

C

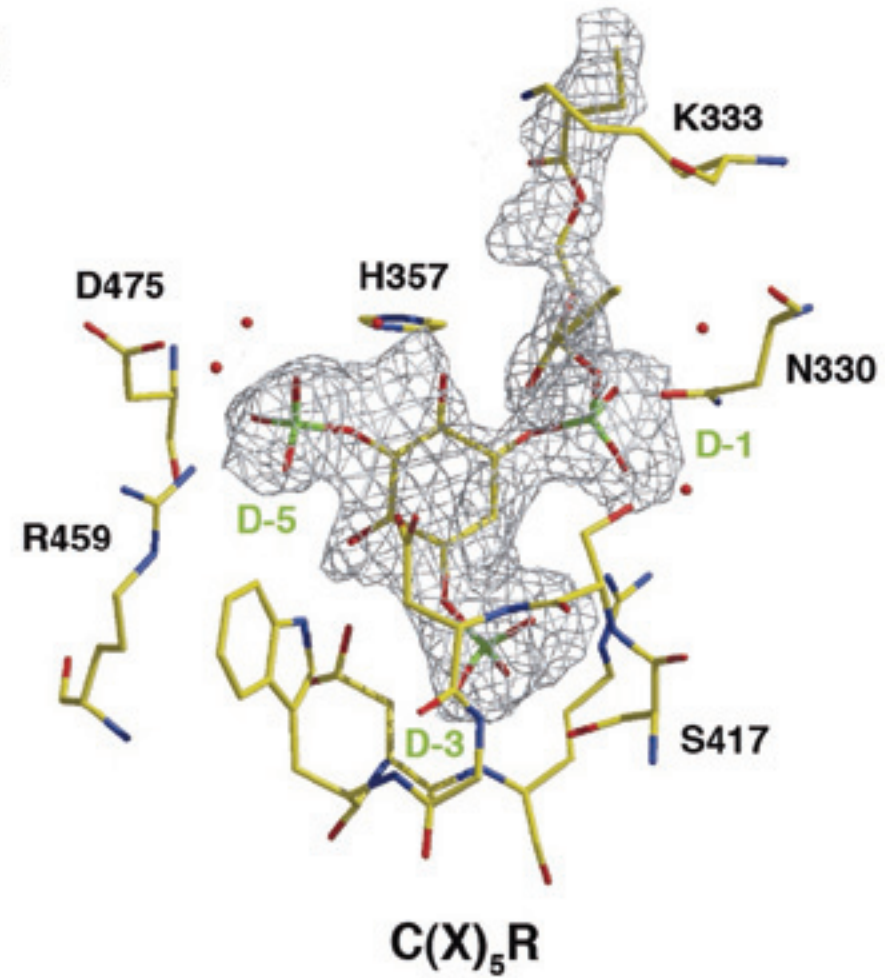

Supplement: pnas_0510006103_1.pdf [file pnas_0510006103_1.pdf]
